# Supplementary material for: Rho GAPs and GEFs: Controling switches in endothelial cell adhesion
Source: PubMed Central journal article supplement — Cell Adh Migr. 2014 Jan 1;8(2):108–24. doi: 10.4161/cam.27599 (PMC4049857; doi:10.4161/cam.27599), 2014-01-01
Supplement: cam-8-108-s03.pdf [file cam-8-108-s03.pdf]

## **Supplemental Material to:**

**Jaap D van Buul, Dirk Geerts, Stephan Huveneers**

**Rho GAPs and GEFs: Switches in endothelial cell adhesion**

**Cell Adhesion & Migration 2014; 8 (1)**

**<http://dx.doi.org/10.4161/cam.27599>**

**<http://www.landesbioscience.com/journals/celladhesion/article/27599/>**

### **Supplemental Materials**

- 1. 2013CAM0081R-SupTable1**
- 2. 2013CAM0081R-SupTable2**

**Supplemental Table 1: Rho regulator gene expression study complete results.**

**Tab 1:** Full Data Table, with all Rho regulator gene expression analysis results and calculations. **Tab 2:** Table Legend, with full description for the columns in Tab 1. **Tab 3:** GEO HUVEC studies, with the NCBI GEO descriptions of the HUVEC studies used. Array GSM345269, from study GSE13736 was deleted from the analysis; it had 23 probe values (out of 265 probes tested) that were significantly different from the average call (over twice the number of all other arrays).

**Supplemental Table 2: Functional annotation table of Rho regulators.**

Full data table, plain text summary of Gene Ontology (GO)-annotated functions of Rho GAPs, GEFs and GDIs. Annotated functions were obtained by DAVID bioinformatics analysis using the listed Affymetrix IDs (<http://david.abcc.ncifcrf.gov>) (Huang,D.W., Sherman,B.T., & Lempicki,R.A. **Systematic and integrative analysis of large gene lists using DAVID bioinformatics resources. *Nat. Protoc.* 4, 44-57 (2009).**
